# Supplementary material for: Dimensions of childhood adversity differentially affect biological aging in major depression
Source: PubMed Central journal article supplement (PMC9532396; doi:10.1038/s41398-022-02198-0), 2022-10-04

**A**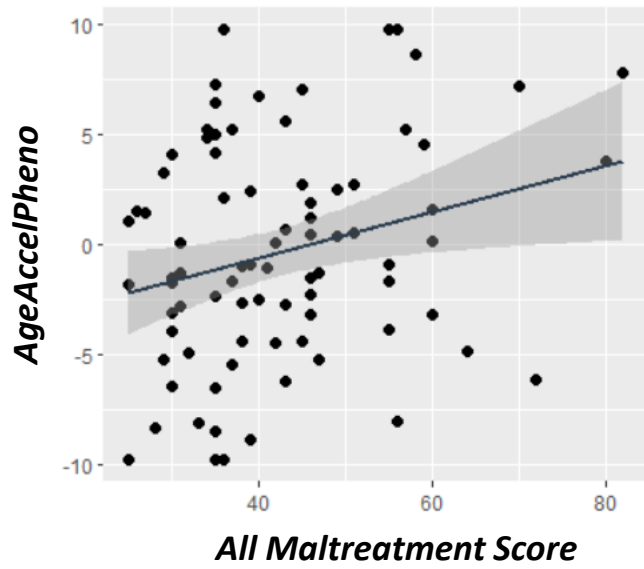**B**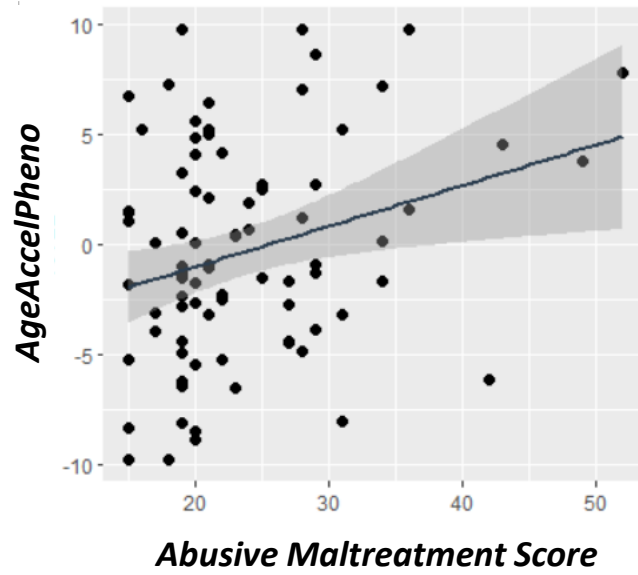**C**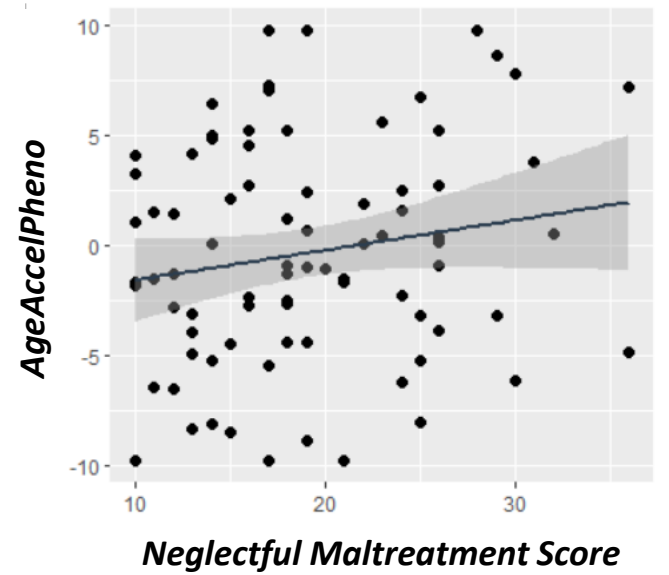

Supplement: 41398_2022_2198_MOESM5_ESM.pdf [file 41398_2022_2198_MOESM5_ESM.pdf]
